# Supplementary material
Source: ML conference proceedings conference paper supplement (https://www.ecva.net/papers/eccv_2020/papers_ECCV/html/123670307_ECCV_2020_paper.php)

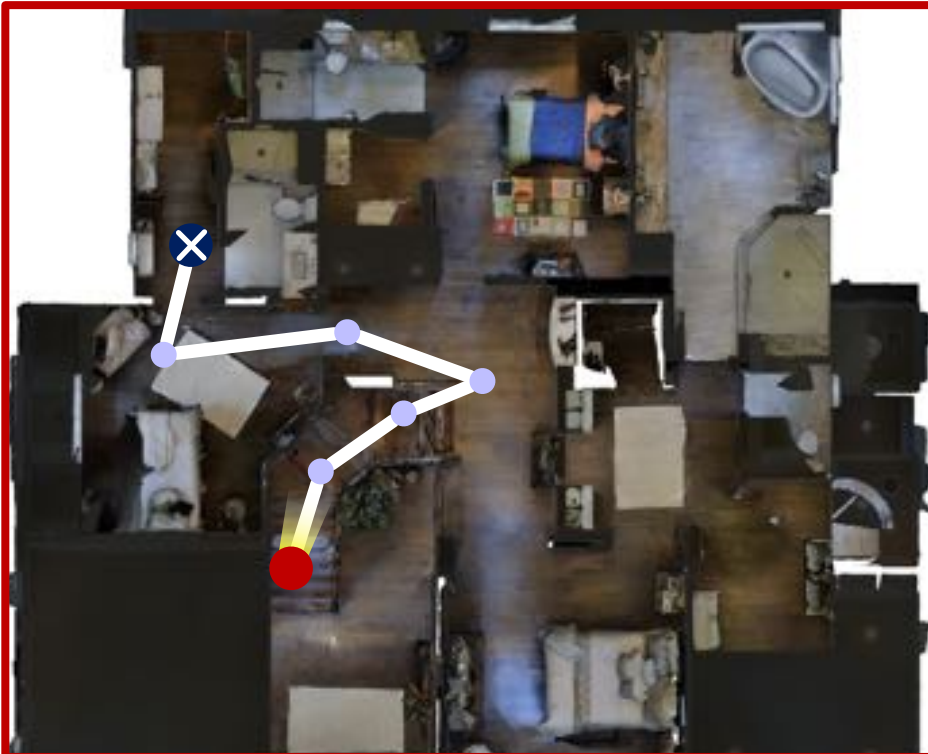

Ground-truth

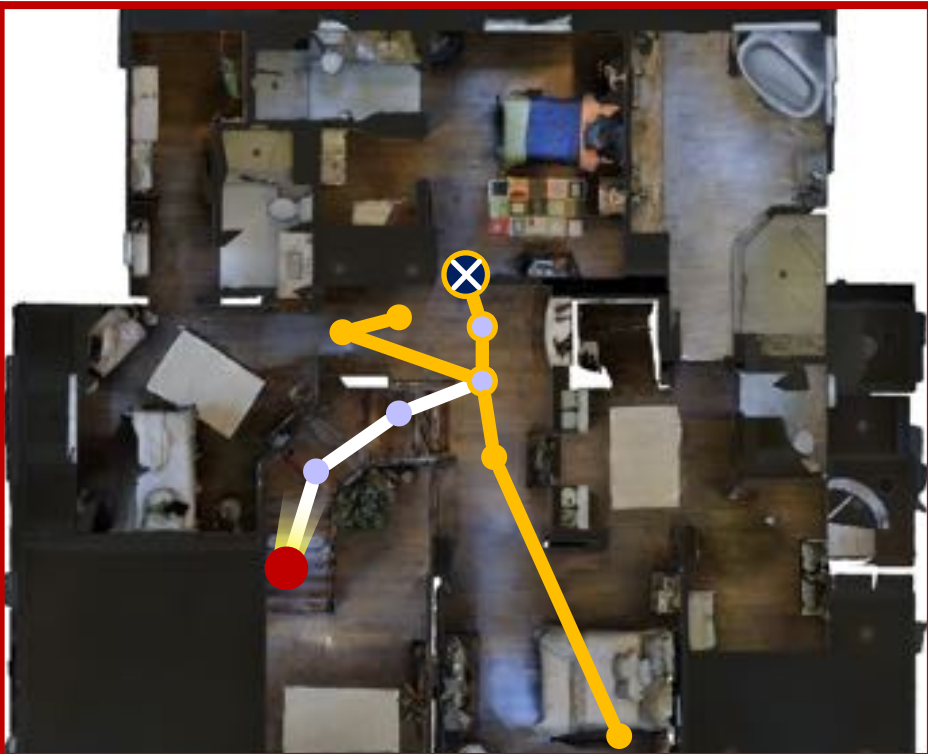

Our agent

**Instruction:** Walk up the flight of stairs to the top.  
**Turn and follow the railing into the bedroom area.**  
 Walk towards the closet.

## Exploration

Navigation: OFF Exploration: **STOP**

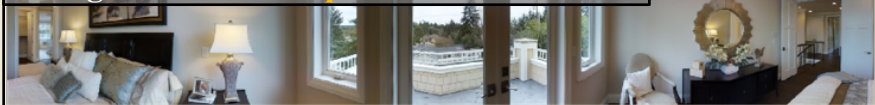

Navigation: OFF Exploration: **ON**

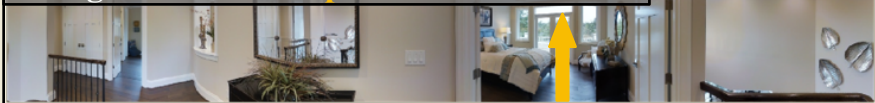

Navigation: OFF Exploration: **STOP**

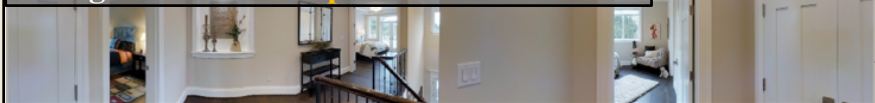

Navigation: OFF Exploration: **ON**

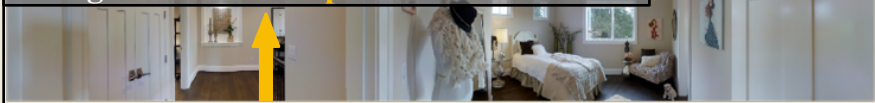

Navigation: OFF Exploration: **STOP**

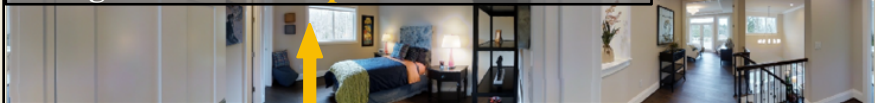

Navigation: OFF Exploration: **ON**

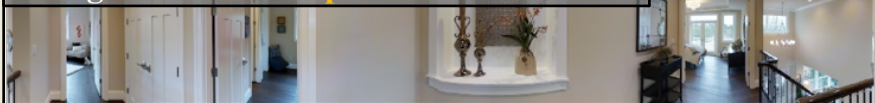

## Navigation

Navigation: **STOP** Exploration: OFF

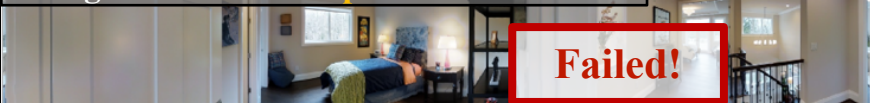

Navigation: OFF Exploration: **ON**

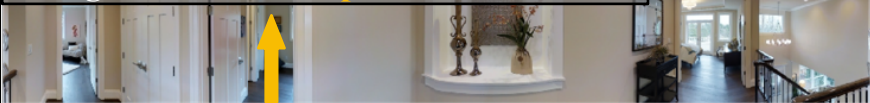

Navigation: OFF Exploration: **ON**

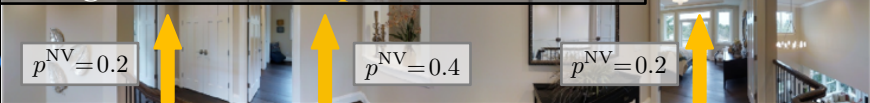

Navigation: OFF Exploration: **ON**

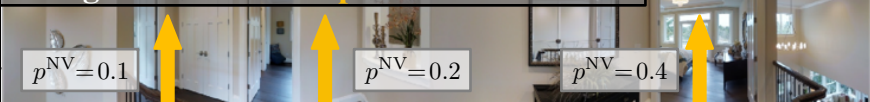

Navigation: OFF Exploration: **ON**

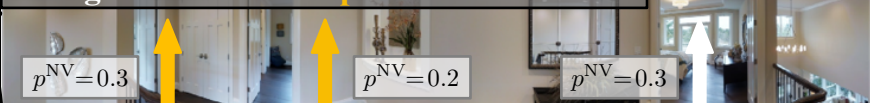

Navigation: OFF Exploration: **ON**

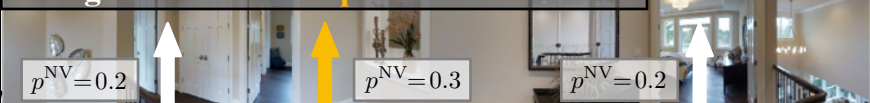

Navigation: **ON** Exploration: OFF

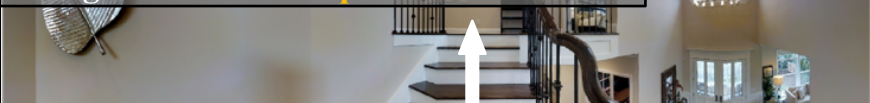

Navigation: **ON** Exploration: OFF

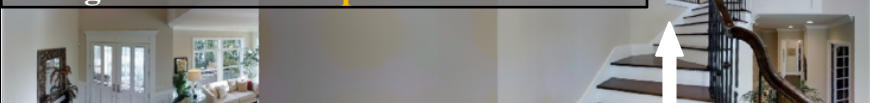

Supplement: Supplementary file 1 [file 123670307-supp.zip]
