# Supplementary material
Source: ML conference proceedings conference paper supplement (https://www.ecva.net/papers/eccv_2020/papers_ECCV/html/123670307_ECCV_2020_paper.php)

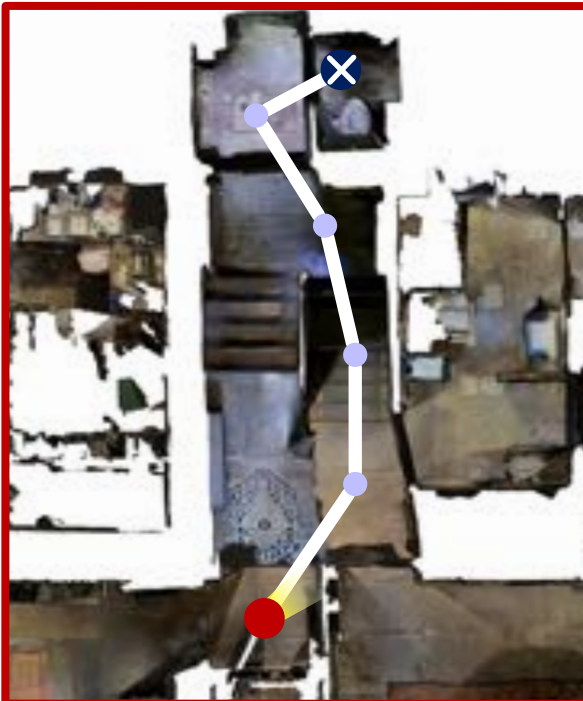

Ground-truth

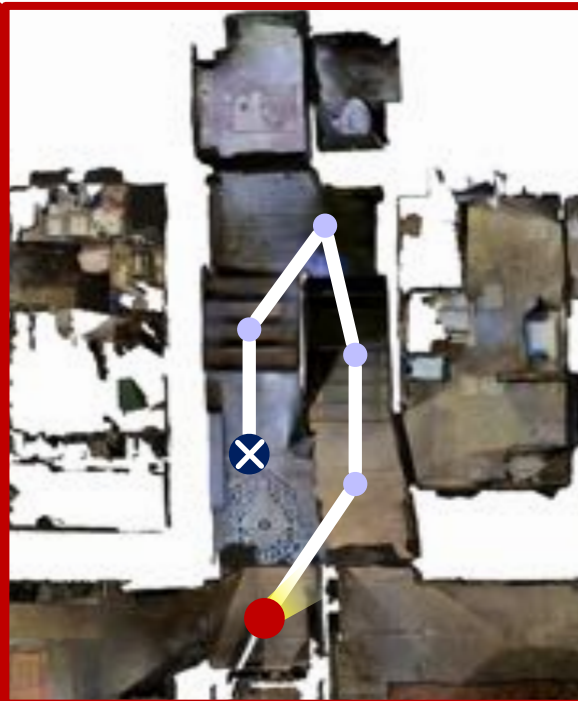

Basic agent

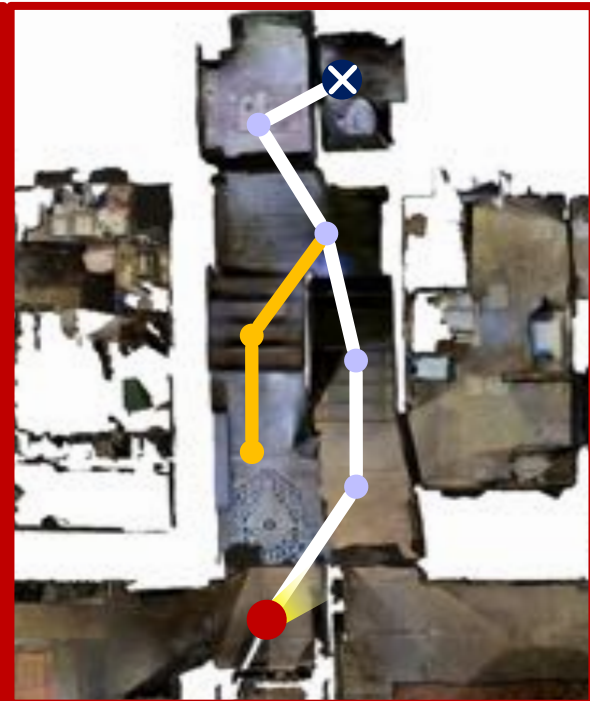

Our agent

**Instruction:** **Go up the stairs one level** and then go outside. Turn right and stop in the outdoor toilet room.

## Exploration

Navigation: OFF Exploration: **STOP**

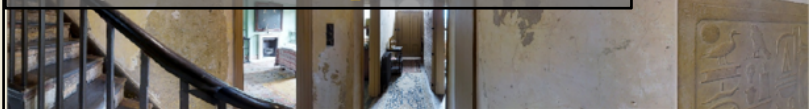

Navigation: OFF Exploration: **ON**

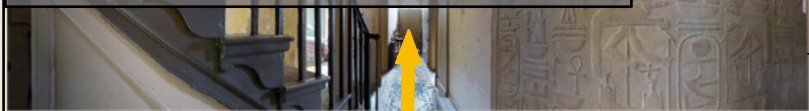

## Navigation

Navigation: **STOP** Exploration: OFF

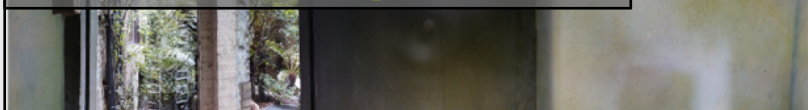

⋮

Navigation: **ON** Exploration: OFF

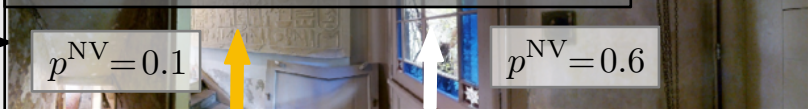

Navigation: OFF Exploration: **ON**

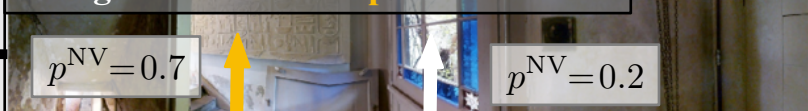

⋮

Navigation: **ON** Exploration: OFF

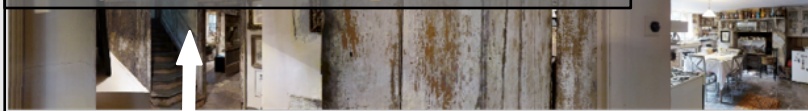

Supplement: Supplementary file 3 [file 123670307-supp.zip]
