# Supplementary material
Source: ML conference proceedings conference paper supplement (https://www.ecva.net/papers/eccv_2020/papers_ECCV/html/123670307_ECCV_2020_paper.php)
Supplement: Supplementary file 4 [file 123670307-supp.zip]

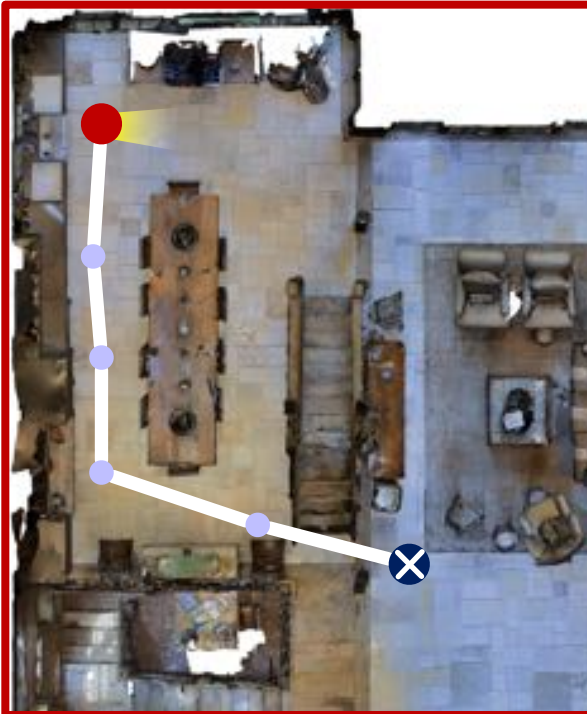

Ground-truth

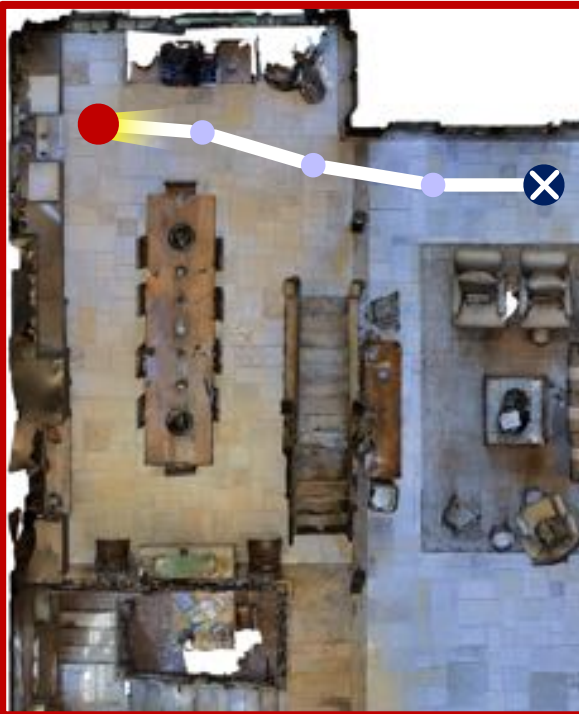

Basic agent

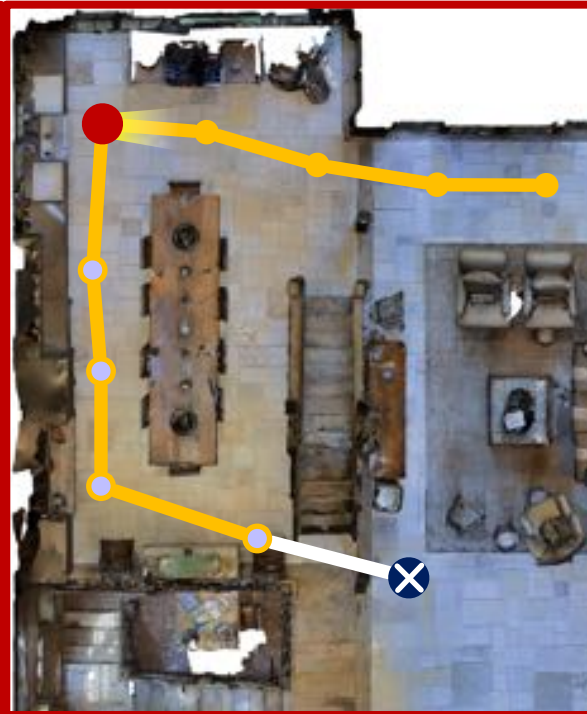

Our agent

**Instruction:** Go straight past the large table and chairs. Turn left and wait near the lamp.

## Exploration 2

Navigation: OFF Exploration: **STOP**

Navigation: OFF Exploration: **ON**

## Exploration 1

Navigation: OFF Exploration: **STOP**

Navigation: OFF Exploration: **ON**

## Navigation

Navigation: **STOP** Exploration: OFF

Navigation: **ON** Exploration: OFF

Navigation: **ON** Exploration: OFF

Navigation: **ON** Exploration: OFF

Navigation: **ON** Exploration: OFF

Navigation: OFF Exploration: **ON**

Navigation: OFF Exploration: **ON**

$p^{NV}=0.2$

$p^{NV}=0.7$

$p^{NV}=0.4$

$p^{NV}=0.4$

$p^{NV}=0.5$

$p^{NV}=0.3$
