# Supplementary material
Source: ML conference proceedings conference paper supplement (https://www.ecva.net/papers/eccv_2020/papers_ECCV/html/123670307_ECCV_2020_paper.php)
Supplement: Supplementary file 6 [file 123670307-supp.zip]

Panoramic Features  $V_t$

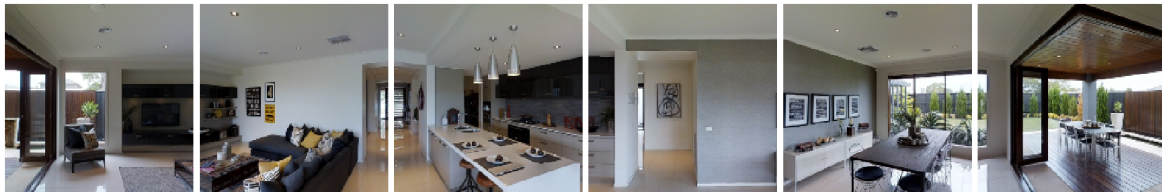

**Instruction:** Walk between the the kitchen counter and the couch and down the hall. Stop near ...

Language Features  $X$

### Navigation

Make navigation decision

$a_t^{nv}$

$\tilde{V}_t$

work flow

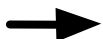

data flow

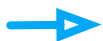

### Exploration

Where to explore

Yes  
 $a_1^{ep}$  is **STOP**

No

Make exploration decision

$a_s^{ep}$  is **STOP**

No

Yes

update  $\tilde{V}_t$
