# Supplementary material
Source: ML conference proceedings conference paper supplement (https://www.ecva.net/papers/eccv_2020/papers_ECCV/html/123670307_ECCV_2020_paper.php)

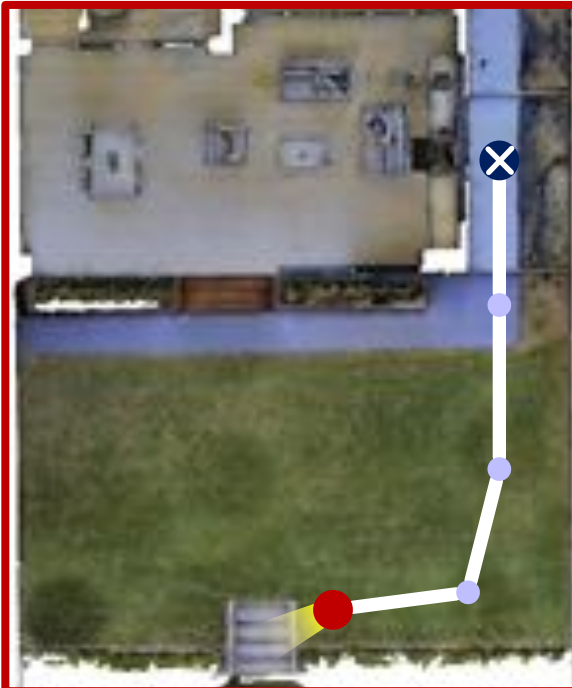

Ground-truth

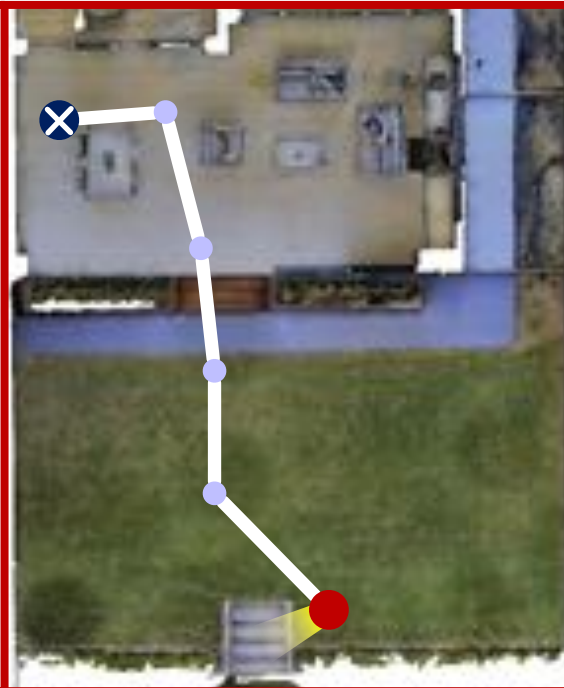

Basic agent

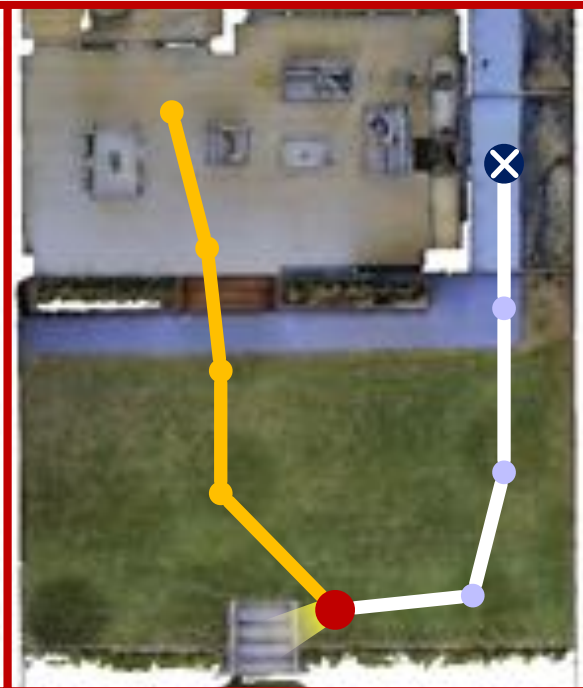

Our agent

**Instruction:** Turn toward your **left** and walk to the **grey fence** at the side of the yard. At the fence, walk along the side of the yard going towards the house. When you get to the sidewalk that runs along the side of the house, walk up one step and then stop before you walk up the second step.

## Exploration

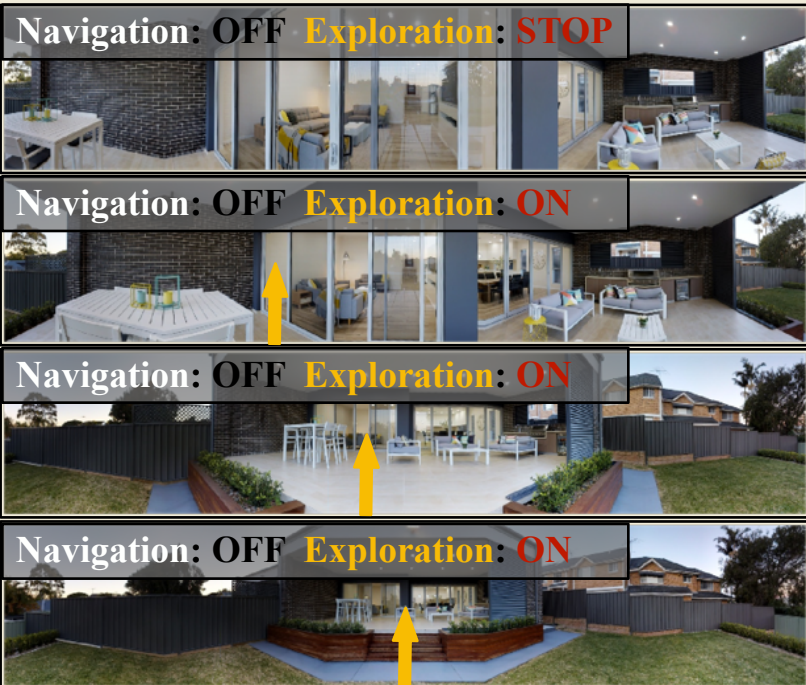

## Navigation

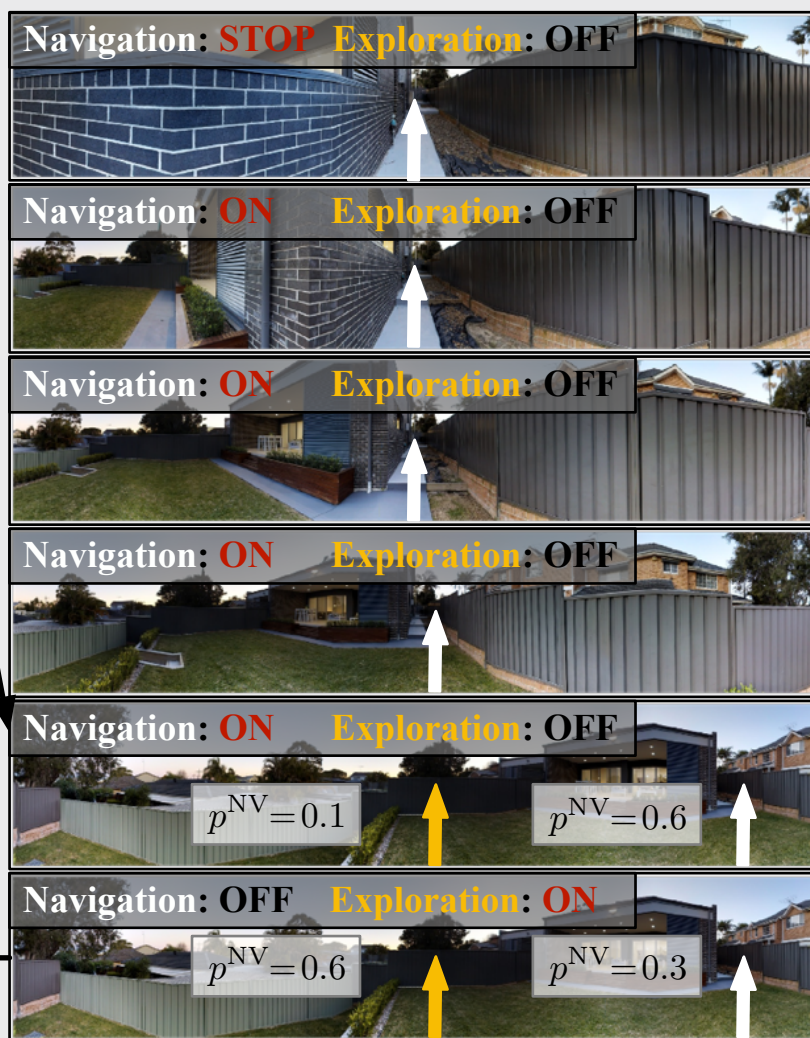

Supplement: Supplementary file 7 [file 123670307-supp.zip]
