# Supplementary material
Source: ML conference proceedings conference paper supplement (https://www.ecva.net/papers/eccv_2020/papers_ECCV/html/123670307_ECCV_2020_paper.php)

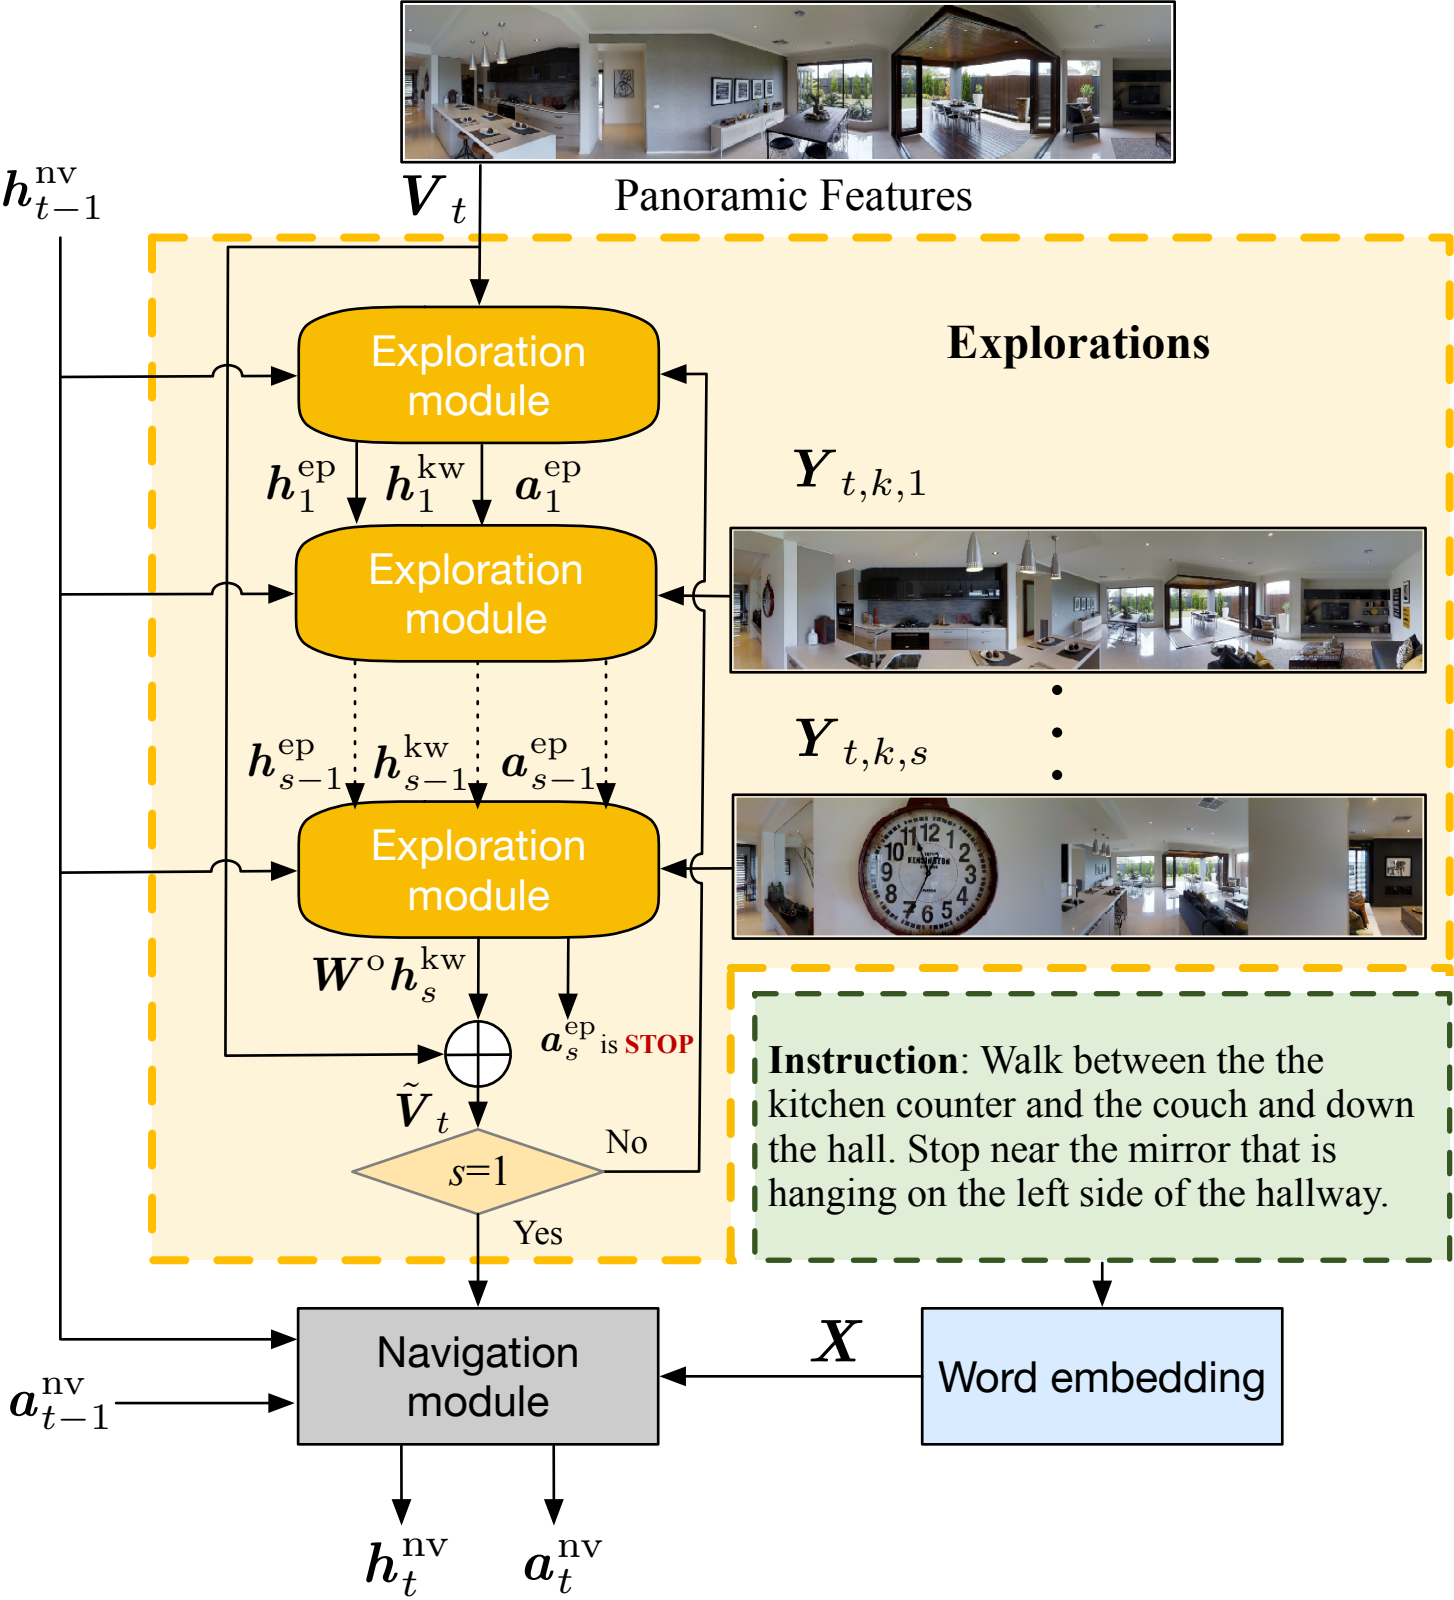

Supplement: Supplementary file 8 [file 123670307-supp.zip]
